# Supplementary material
Source: PubMed Central journal article supplement (PMC6644387)
Supplement: ao8b00577_si_001.pdf [file ao8b00577_si_001.pdf]

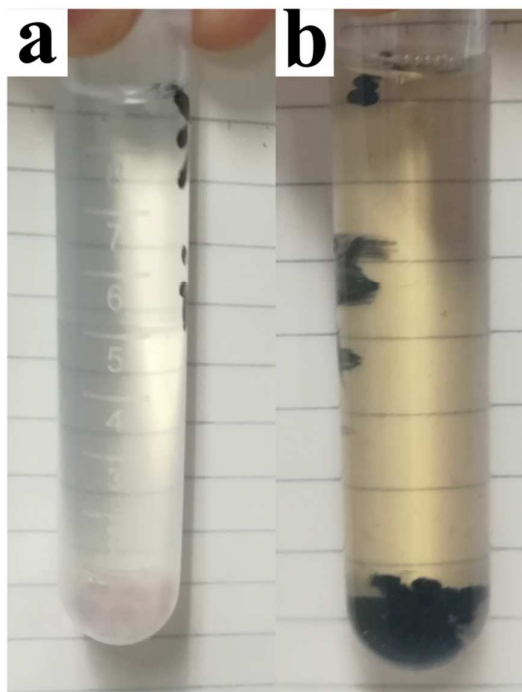

**Figure S1.** Chromogenic reaction of TA-PVA/SA with  $\text{FeCl}_3$ ; (a) TA-PVA/SA hydrogel beads soaked in pure water, (b) colour reaction of dropping  $\text{FeCl}_3$ .

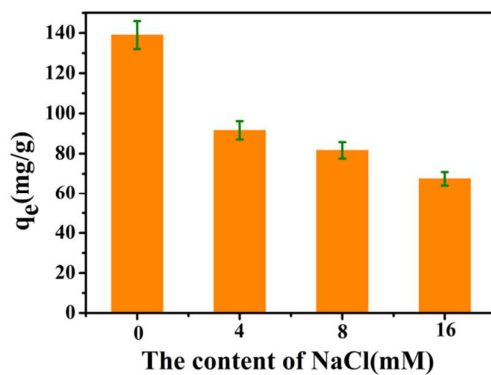

**Figure S2.** Effect of competitive ions on MB removal. ( $C_0$  [MB] = 120 mg/L,  $V$  = 100 mL,  $t$  = 12 h, pH = 9, Dos. = 50 mg,  $T$  = 30 °C)
